# Supplementary material for: Hole theory as a prediction tool for Brownian diffusive motion in binary mixtures of liquids
Source: Royal Society of Chemistry journal article supplement (doi:10.1039/c7ra10787k), 2017-01-01
Supplement: c7ra10787k1.pdf [file c7ra10787k1.pdf]

# ESI - Table S1

| TEA/Water         |                 | Acetone/Benzene       |                 |
|-------------------|-----------------|-----------------------|-----------------|
| Mole fraction TEA | Hole radius [Å] | Mole fraction Acetone | Hole radius [Å] |
| 0.00              | 1.23            | 0.00                  | 2.01            |
| 0.02              | 2.20            | 0.13                  | 2.02            |
| 0.04              | 2.30            | 0.29                  | 2.05            |
| 0.08              | 2.30            | 0.40                  | 2.08            |
| 0.11              | 2.30            | 0.57                  | 2.12            |
| 0.15              | 2.30            | 0.68                  | 2.14            |
| 0.21              | 2.30            | 0.79                  | 2.16            |
| 0.29              | 2.30            | 0.91                  | 2.18            |
| 0.42              | 2.30            | 1.00                  | 2.21            |
| 0.62              | 2.30            |                       |                 |
| 1.00              | 1.99            |                       |                 |

  

| n-Hexane/Nitrobenzene  |                 | <i>n</i> -Heptane/Benzene |                 |
|------------------------|-----------------|---------------------------|-----------------|
| Mole fraction n-Hexane | Hole radius [Å] | Mole fraction n-Heptane   | Hole radius [Å] |
| 0.00                   | 1.66            | 0.10                      | 2.19            |
| 0.07                   | 1.82            | 0.20                      | 2.23            |
| 0.15                   | 2.00            | 0.30                      | 2.23            |
| 0.25                   | 2.14            | 0.37                      | 2.25            |
| 0.32                   | 2.20            | 0.40                      | 2.27            |
| 0.39                   | 2.30            | 0.50                      | 2.28            |
| 0.51                   | 2.38            | 0.60                      | 2.32            |
| 0.62                   | 2.45            | 0.68                      | 2.33            |
| 0.74                   | 2.51            | 0.73                      | 2.34            |
| 0.86                   | 2.55            | 0.80                      | 2.36            |
| 1.00                   | 2.59            | 0.89                      | 2.36            |
|                        |                 | 1.00                      | 2.39            |

  

| Acetone/Chloroform    |                 | Methanol/Water         |                 |
|-----------------------|-----------------|------------------------|-----------------|
| Mole fraction Acetone | Hole radius [Å] | Mole fraction Methanol | Hole radius [Å] |
| 0.00                  | 2.06            | 0.00                   | 1.26            |
| 0.10                  | 2.07            | 0.05                   | 1.43            |
| 0.25                  | 2.10            | 0.10                   | 1.53            |
| 0.35                  | 2.12            | 0.15                   | 1.61            |
| 0.45                  | 2.13            | 0.20                   | 1.69            |
| 0.50                  | 2.13            | 0.25                   | 1.75            |
| 0.55                  | 2.14            | 0.30                   | 1.78            |
| 0.70                  | 2.18            | 0.38                   | 1.86            |
| 0.90                  | 2.21            | 0.49                   | 1.99            |
| 1.00                  | 2.21            | 0.60                   | 2.06            |
|                       |                 | 0.69                   | 2.10            |
|                       |                 | 0.74                   | 2.14            |
|                       |                 | 0.78                   | 2.16            |
|                       |                 | 0.84                   | 2.19            |
|                       |                 | 0.89                   | 2.23            |
|                       |                 | 0.95                   | 2.26            |
|                       |                 | 1.00                   | 2.28            |

| Acetone/Water         |                 |
|-----------------------|-----------------|
| Mole fraction Acetone | Hole radius [Å] |
| 0.00                  | 1.25            |
| 0.10                  | 1.76            |
| 0.19                  | 1.86            |
| 0.31                  | 1.97            |
| 0.47                  | 2.05            |
| 0.54                  | 2.07            |
| 0.62                  | 2.10            |
| 0.73                  | 2.12            |
| 0.85                  | 2.12            |
| 0.86                  | 2.13            |
| 0.90                  | 2.16            |
| 0.93                  | 2.17            |
| 0.96                  | 2.18            |
| 1.00                  | 2.19            |

| Acetone/CT            |                 |
|-----------------------|-----------------|
| Mole fraction Acetone | Hole radius [Å] |
| 0.00                  | 2.09            |
| 0.20                  | 2.12            |
| 0.39                  | 2.14            |
| 0.40                  | 2.15            |
| 0.40                  | 2.15            |
| 0.41                  | 2.15            |
| 0.41                  | 2.15            |
| 0.41                  | 2.15            |
| 0.60                  | 2.17            |
| 0.63                  | 2.18            |
| 0.63                  | 2.18            |
| 0.64                  | 2.18            |
| 0.64                  | 2.18            |
| 0.79                  | 2.20            |
| 0.80                  | 2.20            |
| 0.80                  | 2.20            |
| 0.80                  | 2.20            |
| 0.91                  | 2.22            |
| 0.91                  | 2.22            |
| 1.00                  | 2.23            |

| NMP/Water         |                 |
|-------------------|-----------------|
| Mole fraction NMP | Hole radius [Å] |
| 0.00              | 1.25            |
| 0.10              | 1.52            |
| 0.20              | 1.53            |
| 0.30              | 1.54            |
| 0.40              | 1.56            |
| 0.50              | 1.58            |
| 0.60              | 1.59            |
| 0.70              | 1.61            |
| 0.80              | 1.62            |
| 0.90              | 1.64            |
| 1.00              | 1.65            |

| <i>n</i> -Heptane/ <i>n</i> -Octane |                 |
|-------------------------------------|-----------------|
| Mole fraction <i>n</i> -Heptane     | Hole radius [Å] |
| 0.00                                | 2.28            |
| 0.11                                | 2.29            |
| 0.21                                | 2.30            |
| 0.31                                | 2.31            |
| 0.41                                | 2.32            |
| 0.51                                | 2.32            |
| 0.61                                | 2.33            |
| 0.71                                | 2.34            |
| 0.81                                | 2.35            |
| 0.90                                | 2.36            |
| 1.00                                | 2.37            |
